# Supplementary material for: Adaptive Laboratory Evolution Restores Solvent Tolerance in Plasmid-Cured Pseudomonas putida S12: a Molecular Analysis
Source: PubMed Central journal article supplement (PMC8091024; doi:10.1128/aem.00041-21), 2021-04-13

# Supplemental Materials

## **Adaptive laboratory evolution restores solvent tolerance in plasmid-cured *Pseudomonas putida* S12; a molecular analysis**

Hadiastri Kusumawardhani, Benjamin Furtwängler, Matthijs Blommestijn, Adelé Kaltenytė, Jaap van der Poel, Jan Kolk, Rohola Hosseini, Johannes H. de Winde\*

Institute of Biology Leiden, Leiden University, The Netherlands

\*Correspondence: [j.h.de.winde@biology.leidenuniv.nl](mailto:j.h.de.winde@biology.leidenuniv.nl)

Table S1. Background mutations on plasmid-cured *P. putida* S12 strains (due to the Mitomycin C treatment)

| Strain | Minimum   | Maximum   | Length | Amino Acid Change | CDS Position | Change | Codon Change | Coverage | Polymorphism Type  | Protein Effect | Variant Frequency | Variant P-Value (approximate) |
|--------|-----------|-----------|--------|-------------------|--------------|--------|--------------|----------|--------------------|----------------|-------------------|-------------------------------|
| S12.6  | 1,256,943 | 1,256,943 | 1      |                   |              | G -> C |              | 295      | SNP (transversion) |                | 99.7%             | 1.9E-1086                     |
| S12.22 | 2,812,212 | 2,812,212 | 1      |                   |              | A -> G |              | 188      | SNP (transition)   |                | 34.0%             | 2.1E-93                       |
| S12.6  | 3,316,341 | 3,316,341 | 1      | T -> P            | 157          | T -> G | ACC -> CCC   | 267      | SNP (transversion) | Substitution   | 99.3%             | 1.0E-1007                     |
| S12.10 | 3,316,341 | 3,316,341 | 1      | T -> P            | 157          | T -> G | ACC -> CCC   | 368      | SNP (transversion) | Substitution   | 99.7%             | 4.6E-1393                     |
| S12.22 | 3,316,341 | 3,316,341 | 1      | T -> P            | 157          | T -> G | ACC -> CCC   | 238      | SNP (transversion) | Substitution   | 100.0%            | 4.0E-905                      |



| Strain    | Parent Strain | Name | Minimum                     | Maximum | Length | Amino Acid Change | CDS Position | Change         | Codon Change | Coverage | Polymorphism Type         | Protein Effect                    | Variant Frequency | Variant P-Value (approximate) |
|-----------|---------------|------|-----------------------------|---------|--------|-------------------|--------------|----------------|--------------|----------|---------------------------|-----------------------------------|-------------------|-------------------------------|
| S12-10e35 | S12-10        | A    | 2709165                     | 2709165 | 1      | A -> T            | 565          | G -> A         | GCC -> ACC   | 217      | SNP (transition)          | Substitution                      | 93.1%             | 2.1E-686                      |
| S12-10e35 | S12-10        | C    | 2735364                     | 2735363 | 0      |                   | 233          | (C)3 -> (C)4   |              | 253      | Insertion (tandem repeat) | Frame Shift                       | 99.2%             | 1.8E-903                      |
| S12-10e35 | S12-10        | G    | 2812212                     | 2812212 | 1      |                   |              | A -> G         |              | 216      | SNP (transition)          |                                   | 30.1%             | 4.6E-97                       |
| S12-10e35 | S12-10        | C    | 2920552                     | 2920552 | 1      | V -> A            | 986          | T -> C         | GTG -> GCG   | 269      | SNP (transition)          | Substitution                      | 99.3%             | 2.9E-1014                     |
| S12-10e35 | S12-10        | G    | 2922216                     | 2922216 | 1      |                   | 27           | A -> G         | GCT -> CCC   | 268      | SNP (transition)          | None                              | 91.0%             | 1.4E-852                      |
| S12-10e35 | S12-10        | T    | 2966285                     | 2966285 | 1      | A -> T            | 229          | C -> T         | GCT -> ACT   | 285      | SNP (transition)          | Substitution                      | 92.3%             | 4.6E-971                      |
| S12-10e35 | S12-10        | T    | 3056701                     | 3056701 | 1      | G -> D            | 688          | C -> T         | GGC -> GAC   | 267      | SNP (transition)          | Substitution                      | 97.0%             | 2.2E-872                      |
| S12-10e35 | S12-10        | G    | 3097502                     | 3097501 | 0      |                   | 984          | (G)6 -> (G)7   |              | 295      | Insertion (tandem repeat) | Frame Shift                       | 100.0%            | 1.0E-1062                     |
| S12-10e35 | S12-10        | G    | 3101879                     | 3101878 | 0      |                   | 843          | (G)6 -> (G)7   |              | 257      | Insertion (tandem repeat) | Frame Shift                       | 99.6%             | 2.5E-922                      |
| S12-10e35 | S12-10        | T    | 3109593                     | 3109593 | 1      |                   |              | C -> T         |              | 225      | SNP (transition)          |                                   | 100.0%            | 1.0E-810                      |
| S12-10e35 | S12-10        |      | 3146925                     | 3146925 | 1      |                   |              | (G)8 -> (G)7   |              | 234      | Deletion (tandem repeat)  |                                   | 100.0%            | 4.0E-375                      |
| S12-10e35 | S12-10        | T    | 3249350                     | 3249350 | 1      | A -> V            | 68           | C -> T         | GCC -> GTC   | 232      | SNP (transition)          | Substitution                      | 98.3%             | 2.4E-797                      |
| S12-10e35 | S12-10        | T    | 3297187                     | 3297187 | 1      | T -> I            | 833          | C -> T         | ACC -> ATC   | 258      | SNP (transition)          | Substitution                      | 99.1%             | 8.2E-794                      |
| S12-10e35 | S12-10        | G    | 3303300                     | 3303300 | 1      | V -> A            | 2,699        | A -> G         | ATC -> GCG   | 266      | SNP (transition)          | Substitution                      | 99.2%             | 5.6E-973                      |
| S12-10e35 | S12-10        | G    | 3307552                     | 3307551 | 0      |                   | 140          | (G)6 -> (G)7   |              | 261      | Insertion (tandem repeat) | Frame Shift                       | 97.3%             | 1.6E-933                      |
| S12-10e35 | S12-10        | G    | 3316341                     | 3316341 | 1      | T -> P            | 157          | T -> G         | ACC -> CCC   | 253      | SNP (transversion)        | Substitution                      | 100.0%            | 4.0E-962                      |
| S12-10e35 | S12-10        | G    | 3316345                     | 3316344 | 0      |                   | 154          | (G)3 -> (G)4   |              | 250      | Insertion (tandem repeat) | Frame Shift                       | 99.6%             | 4.0E-897                      |
| S12-10e35 | S12-10        | G    | 3419216                     | 3419216 | 1      |                   | 798          | A -> G         | CAA -> CAG   | 263      | SNP (transition)          | None                              | 99.6%             | 2.5E-996                      |
| S12-10e35 | S12-10        | G    | 3452892                     | 3452892 | 1      | Y -> H            | 1,156        | A -> G         | TAC -> CAC   | 253      | SNP (transition)          | Substitution                      | 99.6%             | 2.5E-958                      |
| S12-10e35 | S12-10        | A    | 3479624                     | 3479624 | 1      | X -> E            | 788          | M -> A         | GMG -> GAG   | 222      | SNP                       | Substitution                      | 99.5%             | 5.6E-65                       |
| S12-10e35 | S12-10        | G    | 3528742                     | 3528741 | 0      |                   | 316          | (G)6 -> (G)7   |              | 268      | Insertion (tandem repeat) | Frame Shift                       | 99.3%             | 2.5E-958                      |
| S12-10e35 | S12-10        | T    | 3537413                     | 3537413 | 1      | A -> V            | 329          | C -> T         | GCC -> GTC   | 262      | SNP (transition)          | Substitution                      | 89.3%             | 4.2E-856                      |
| S12-10e35 | S12-10        | G    | 3690651                     | 3690651 | 1      | Y -> C            | 2,177        | A -> G         | TAC -> TGC   | 237      | SNP (transition)          | Substitution                      | 91.1%             | 3.0E-794                      |
| S12-10e35 | S12-10        | T    | 3748119                     | 3748119 | 1      |                   |              | C -> T         |              | 246      | SNP (transition)          |                                   | 99.2%             | 2.5E-830                      |
| S12-10e35 | S12-10        | C    | 3858978                     | 3858978 | 1      |                   | 639          | T -> C         | CGT -> CGC   | 242      | SNP (transition)          | None                              | 100.0%            | 2.5E-920                      |
| S12-10e35 | S12-10        | G    | 3865096                     | 3865096 | 1      | D -> A            | 3,089        | T -> G         | GAC -> GCC   | 221      | SNP (transversion)        | Substitution                      | 99.5%             | 1.4E-768                      |
| S12-10e35 | S12-10        | G    | 3946605                     | 3946604 | 0      |                   |              | (G)7 -> (G)8   |              | 214      | Insertion (tandem repeat) |                                   | 95.3%             | 8.8E-624                      |
| S12-10e35 | S12-10        | G    | 4176584                     | 4176583 | 0      |                   | 474          | (G)5 -> (G)6   |              | 230      | Insertion (tandem repeat) | Frame Shift                       | 95.7%             | 1.3E-784                      |
| S12-10e35 | S12-10        | T    | 4221641                     | 4221641 | 1      | R -> C            | 1,192        | C -> T         | CGT -> TGT   | 253      | SNP (transition)          | Substitution                      | 99.6%             | 4.0E-933                      |
| S12-10e35 | S12-10        | G    | 4463943                     | 4463942 | 0      |                   | 275          | (G)7 -> (G)8   |              | 243      | Insertion (tandem repeat) | Frame Shift                       | 99.6%             | 4.0E-896                      |
| S12-10e35 | S12-10        | G    | 4666198                     | 4666198 | 1      |                   | 1,179        | A -> G         | GGT -> GGC   | 232      | SNP (transition)          | None                              | 95.7%             | 2.5E-809                      |
| S12-10e35 | S12-10        | G    | 4711920                     | 4711919 | 0      |                   | 284          | (G)5 -> (G)6   |              | 262      | Insertion (tandem repeat) | Frame Shift                       | 99.6%             | 2.5E-940                      |
| S12-10e35 | S12-10        | A    | 4742974                     | 4742974 | 1      | G -> D            | 476          | G -> A         | GGC -> GAC   | 234      | SNP (transition)          | Substitution                      | 95.3%             | 2.3E-810                      |
| S12-10e35 | S12-10        | T    | 4743032                     | 4743032 | 1      |                   | 534          | C -> T         | CGC -> CGT   | 220      | SNP (transition)          | None                              | 33.2%             | 1.2E-212                      |
| S12-10e35 | S12-10        | G    | 4836001                     | 4836000 | 0      |                   | 1,033        | (G)6 -> (G)7   |              | 247      | Insertion (tandem repeat) | Frame Shift                       | 91.9%             | 4.2E-824                      |
| S12-10e35 | S12-10        | G    | 4928278                     | 4928278 | 1      | F -> L            | 943          | A -> G         | TTC -> CTC   | 256      | SNP (transition)          | Substitution                      | 99.6%             | 1.0E-969                      |
| S12-10e35 | S12-10        | C    | 5043280                     | 5043279 | 0      |                   | 721          | (C)8 -> (C)9   |              | 208      | Insertion (tandem repeat) | Frame Shift                       | 99.0%             | 1.6E-783                      |
| S12-10e35 | S12-10        | C    | 5146750                     | 5146750 | 1      | T -> A            | 508          | T -> C         | ACG -> GCG   | 227      | SNP (transition)          | Substitution                      | 88.5%             | 2.2E-734                      |
| S12-10e35 | S12-10        | C    | 5167012                     | 5167012 | 1      | V -> A            | 233          | T -> C         | GTC -> GCC   | 233      | SNP (transition)          | Substitution                      | 99.1%             | 3.4E-832                      |
| S12-10e35 | S12-10        | A    | 5424887                     | 5424887 | 1      |                   | 2,610        | G -> A         | AGC -> AGT   | 269      | SNP (transition)          | None                              | 97.8%             | 3.3E-918                      |
| S12-10e35 | S12-10        | G    | 5530225                     | 5530225 | 1      | S -> P            | 220          | A -> G         | TCG -> CCG   | 245      | SNP (transition)          | Substitution                      | 98.8%             | 6.4E-891                      |
| S12-10e35 | S12-10        | G    | 5594662                     | 5594662 | 1      |                   | 882          | A -> G         | GAA -> GAG   | 219      | SNP (transition)          | None                              | 99.1%             | 6.7E-803                      |
| S12-10e35 | S12-10        | C    | 5602034                     | 5602034 | 1      | L -> P            | 728          | T -> C         | CTC -> CCC   | 225      | SNP (transition)          | Substitution                      | 99.1%             | 4.1E-800                      |
| S12-10e35 | S12-10        | A    | 5610231                     | 5610231 | 1      | E -> K            | 1,015        | G -> A         | GAA -> AAA   | 249      | SNP (transition)          | Substitution                      | 98.0%             | 1.0E-851                      |
| S12-10e35 | S12-10        |      | 5711294                     | 5711294 | 1      |                   |              | (G)12 -> (G)11 |              | 136      | Deletion (tandem repeat)  |                                   | 96.3%             | 3.1E-144                      |
| S12-22e30 | S12-22        | A    | 142041                      | 142041  | 1      | P -> L            | 269          | G -> A         | CCC -> CTC   | 249      | SNP (transition)          | Substitution                      | 98.8%             | 6.3E-911                      |
| S12-22e30 | S12-22        | C    | 1595974                     | 1595974 | 1      | D -> E            | 1,230        | G -> C         | GAC -> GAG   | 310      | SNP (transversion)        | Substitution                      | 99.7%             | 6.2E-1142                     |
| S12-22e30 | S12-22        | C    | 2150602                     | 2150602 | 1      |                   |              | G -> C         |              | 259      | SNP (transversion)        |                                   | 100.0%            | 6.3E-985                      |
| S12-22e30 | S12-22        |      | 3316341                     | 3316341 | 1      |                   | 157          | -T             |              | 253      | Deletion                  | Frame Shift                       | 100.0%            | 4.0E-456                      |
| S12-22e30 | S12-22        |      | RPPX_RS14645 - RPPX_RS14650 |         |        |                   |              |                |              |          |                           | insertion of mobile element ISS12 |                   |                               |

**Figure S1. Volcano plot of differential gene expression in wild-type, plasmid-cured, and ALE-derived *P. putida* S12 strains in the presence of 0.1% (vol/vol) toluene growing on LB.**

Blue area indicates the significantly upregulated genes and beige area indicates the significantly downregulated genes (cut-off:  $\text{Log}_2$  Fold Change  $\geq 1$  for up-regulated genes or  $\leq -1$  for down-regulated genes and FDR-adjusted p-value  $\leq 0.05$ ). The black dots represent the significantly up-/down-regulated genes.

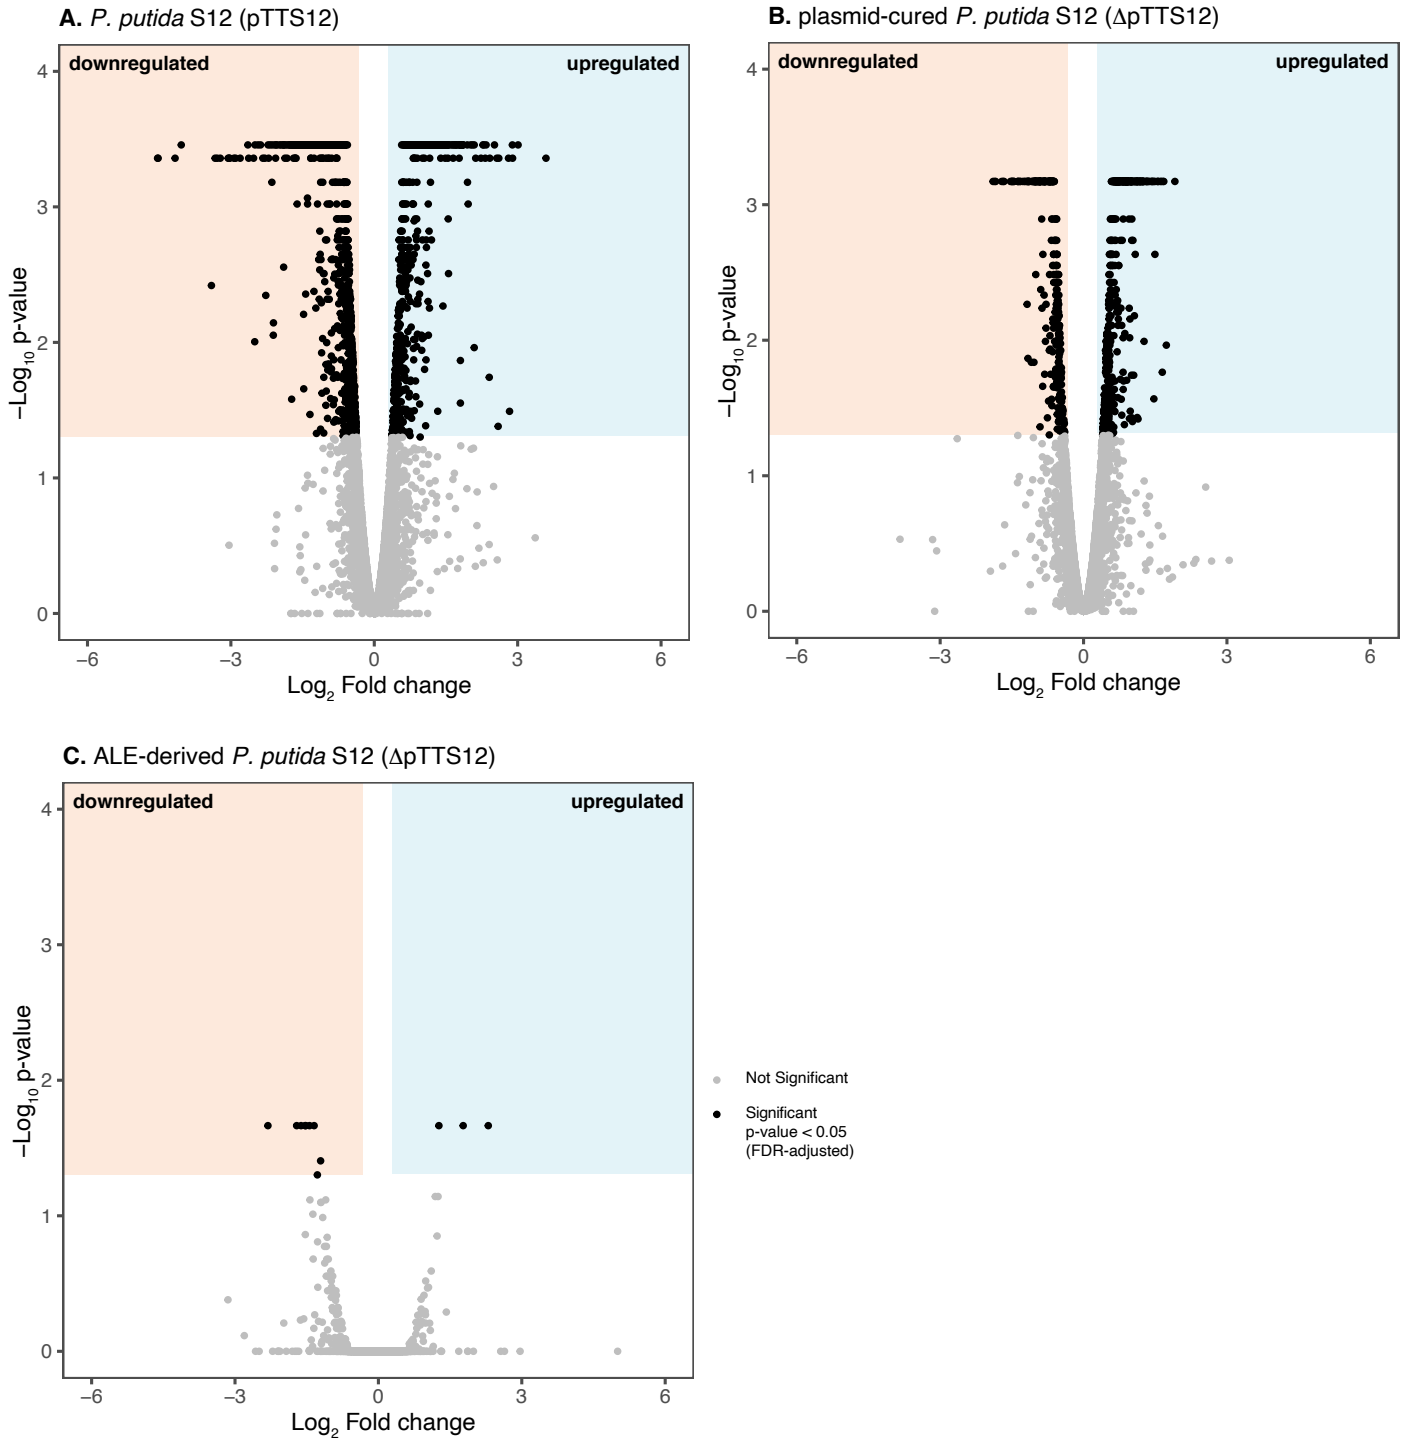

Supplement: AEM.00041-21-s0001.pdf [file AEM.00041-21-s0001.pdf]
